# Supplementary material for: High-throughput endogenous measurement of S-nitrosylation in Alzheimer's disease using oxidized cysteine-selective cPILOT
Source: Royal Society of Chemistry journal article supplement (doi:10.1039/c6an00417b), 2016-01-01
Supplement: c6an00417b3.xlsx [file c6an00417b3.xlsx]

## Sheet: Sheet1
Supplemental Table S2. List of quantified SNO-peptides (N = 4, 3, 2)
Sequence	Acc. No.	Protein Name	Protein Ratios			SNO Site Occupancy in WTa					SNO Site Occupancy in ADa					SNO log(2) Fold Change AD/WT in Each Biological Replicateb							Ne
			Protein AD/WT		Average	%SNO in WT in each Biological Replicate				Average	%SNO in AD in each Biological Replicate				Average	Log2SNO(AD/WT)				Average	Statistics
			1	2		1	2	3	4		1	2	3	4		1	2	3	4
aALEQPcEGSLTRPk	P84086	Complexin-2	0.912574	0.910695	0.911635	0.00211441	0.0023394	0.00236674	0.00179188	0.0021531	0.00288932	0.00317787	0.00214197	0.00223645	0.0026114	0.45048	0.441924	-0.143961	0.319738	0.267045	p-valuec	0.114389	4
aAPQWcQGk	O08539	Myc box-dependent-interacting protein 1	0.853596	0.959253	0.906425	0.00284771	0.00474044	0.00280154	0.00350685	0.00347413	0.00561351	0.00489117	0.00373597	0.0044424	0.00467076	0.979102	0.0451561	0.415263	0.341165	0.445171		0.0049995	4
acLYAGVk	P15105	Glutamine synthetase	0.873843	1.24778	1.06081	0.0318108	0.0336761	0.0933943	0.0853521	0.0610583	0.0457716	0.0352308	0.06512	0.0695994	0.0539305	0.524936	0.0651125	-0.520234	-0.294351	-0.0561341		0.994101	4
acNcLLLk	D3Z6E4	Enolase	1.00053	1.13557	1.06805	0.106712	0.103467	0.149271	0.138794	0.124561	0.124115	0.0986601	0.0982511	0.12569	0.111679	0.217961	-0.0686326	-0.603391	-0.143072	-0.149284		0.567043	4
aDcLVPSEIRk	Q9Z2Q6	Septin-5	0.874801	0.916117	0.895459	0.00112472	0.00191721	0.00171786	0.00231158	0.00176784	0.00410665	0.00276362	0.00256065	0.00274154	0.00304311	1.86839	0.527548	0.575898	0.246106	0.804486		9.999e-05	4
aHVIGTPcSk	Q63912	Oligodendrocyte-myelin glycoprotein	1.07278	1.07535	1.07407	0.0493218	0.0326657	0.0303866	0.027548	0.0349806	0.034593	0.0562704	0.0211573	0.0232067	0.0338068	-0.511748	0.784598	-0.52228	-0.247411	-0.12421		0.875812	4
akFENLck	P11499	Heat shock protein HSP 90-beta	0.935856	1.23404	1.08495	0.00962813	0.00832329	0.00433771	0.00876844	0.00776439	0.00778873	0.00837634	0.00526603	0.00730541	0.00718413	-0.305868	0.00916567	0.279781	-0.263355	-0.0700691		0.682032	4
aVLcPPPVk	P60764	RAS-related C3 botulinum substrate 3, isoform CRA_a	0.948624	0.908985	0.928804	0.00305634	0.00595236	0.00489429	0.00516861	0.0047679	0.00643096	0.0059784	0.00496163	0.00664261	0.0060034	1.07323	0.0062972	0.0197147	0.361974	0.365303		0.00989901	4
dTVQcLcVVk	P20917	Mag protein	1.1142	1.45399	1.2841	0.0378446	0.0508773	0.0552097	0.0343988	0.0445826	0.0390307	0.0383234	0.0236582	0.0450239	0.036509	0.0445221	-0.408798	-1.22258	0.388333	-0.299631		0.520448	4
eAELSkGESVcLDR	P62073	Mitochondrial import inner membrane translocase subunit Tim10	1.06211	0.956137	1.00913	0.0189809	0.0253442	0.0249944	0.0274193	0.0241847	0.0210459	0.0146963	0.0143204	0.0331866	0.0208123	0.14899	-0.786197	-0.80353	0.275407	-0.291333		0.39996	4
ecSEVQPk	Q9CQ75	NADH dehydrogenase [ubiquinone] 1 alpha subcomplex subunit 2	1.00771	1.07448	1.04109	0.0107998	0.0117262	0.00947254	0.0090434	0.0102605	0.012393	0.012116	0.00741927	0.0103822	0.0105776	0.198527	0.0471764	-0.352474	0.199178	0.023102		0.856514	4
eFNGLGDcLTk	P48962	ADP/ATP translocase 1	0.859796	0.841169	0.850482	0.00802565	0.00933017	0.00732978	0.00454936	0.00730874	0.0106656	0.0117284	0.00828099	0.0113938	0.0105172	0.410279	0.33003	0.176034	1.32451	0.560213		9.999e-05	4
eGAPSLLck	Q9Z0E0	Neurochondrin	0.938928	1.03656	0.987743	0.00739326	0.00839571	0.00665858	0.00615655	0.00715103	0.00749573	0.00762687	0.00653504	0.00593624	0.00689847	0.0198569	-0.138561	-0.0270194	-0.0525739	-0.0495745		0.113989	4
eGkPcIIIk	P14094	Sodium/potassium-transporting ATPase subunit beta-1	0.953716	0.86883	0.911273	0.00328366	0.00218763	0.0033659	0.00432153	0.00328968	0.00408723	0.00194234	0.00507749	0.00606795	0.00429375	0.315817	-0.171572	0.593122	0.489668	0.306759		0.140886	4
eIVHIQAGQcGNQIGAk	P99024;Q9ERD7	Tubulin beta-3/5 chain	1.01718	0.963093	0.990135	0.01735	0.0138101	0.0144836	0.0148468	0.0151226	0.0137304	0.0147287	0.0104177	0.0141452	0.0132555	-0.337564	0.0928999	-0.475381	-0.0698411	-0.197472		0.29957	4
eIVHLQAGQcGNQIGAk	P99024;Q9ERD7	Tubulin beta-3/5 chain	1.01718	0.963093	0.990135	0.01735	0.0138101	0.0144836	0.0148468	0.0151226	0.0137304	0.0147287	0.0104177	0.0141452	0.0132555	-0.337564	0.0928999	-0.475381	-0.0698411	-0.197472		0.311169	4
fcLDNGAk	P09411	Phosphoglycerate kinase	0.976686	0.948721	0.962703	0.00276113	0.0028147	0.00215518	0.00210103	0.00245801	0.00333249	0.00266242	0.00190049	0.00262783	0.00263081	0.271343	-0.0802416	-0.181435	0.32278	0.0831114		0.413459	4
fSAVALck	Q9R0P9	Ubiquitin carboxyl-terminal hydrolase isozyme L1	1.01035	1.10534	1.05785	0.00506975	0.00456459	0.00359027	0.00480788	0.00450812	0.00430855	0.00475442	0.00367245	0.00366083	0.00409906	-0.234713	0.058784	0.0326528	-0.393232	-0.134127		0.411259	4
fSQIcAk	P56382	ATP synthase subunit epsilon, mitochondrial	0.977431	1.07284	1.02513	0.00116079	0.00140444	0.00197743	0.0014263	0.00149224	0.00149928	0.00183424	0.00132947	0.00138019	0.00151079	0.369157	0.385187	-0.57278	-0.0474082	0.0335391		0.970203	4
gIFPVLck	P52480	Pyruvate kinase PKM	0.91727	1.01477	0.96602	0.00157186	0.00342607	0.00163523	0.00295726	0.00239761	0.00356864	0.00345138	0.00171831	0.00204713	0.00269636	1.1829	0.0106187	0.0714908	-0.530663	0.183587		0.589841	4
gLGDcLVk	P51881	ADP/ATP translocase 2	0.939913	0.852684	0.896299	0.0086544	0.00899023	0.00673862	0.00463271	0.00725399	0.00771889	0.00800414	0.0063046	0.00701918	0.0072617	-0.165042	-0.167611	-0.0960483	0.599446	0.0426863		0.977602	4
gLLDVTck	E9PUV4	S-phase kinase-associated protein 1	0.995826	1.01514	1.00548	0.00555942	0.00717656	0.00504343	0.00663474	0.00610354	0.00808642	0.00600243	0.00564402	0.00729207	0.00675623	0.540566	-0.257745	0.162317	0.13629	0.145357		0.458554	4
gSSNFcVk	Q80SW1	Putative adenosylhomocysteinase 2	0.95357	1.05441	1.00399	0.00692333	0.00918014	0.0060501	0.00763865	0.00744805	0.0109724	0.0084868	0.00624107	0.00739137	0.00827292	0.664347	-0.113295	0.0448334	-0.0474766	0.137102		0.856714	4
gVIEcLk	Q91VA7	Isocitrate dehydrogenase [NAD] subunit, mitochondrial	0.944437	0.926666	0.935552	0.00297357	0.00351059	0.00214145	0.00313347	0.00293977	0.00468787	0.0038231	0.00334552	0.00334072	0.0037993	0.656738	0.123028	0.643645	0.0923961	0.378952		0.0111989	4
gYLGPEQLPDcLk	P08249	Malate dehydrogenase, mitochondrial	0.97553	0.909502	0.942516	0.00458535	0.00965346	0.00448763	0.00791472	0.00666029	0.00779093	0.00877756	0.00762142	0.00738133	0.00789281	0.764764	-0.137226	0.764105	-0.100659	0.322746		0.40086	4
icQEVLPk	O55126	Protein NipSnap homolog 2	1.16509	1.1195	1.1423	0.014481	0.0139295	0.0144188	0.014383	0.0143031	0.0124531	0.0132677	0.0124257	0.0118795	0.0125065	-0.217648	-0.0702254	-0.214626	-0.275896	-0.194599		9.999e-05	4
iVSNAScTTNcLAPLAk	P16858	Glyceraldehyde-3-phosphate dehydrogenase	1.67357	1.35688	1.51523	0.00475049	0.00830599	0.00064658	0.00325697	0.00424001	0.0058581	0.00516824	0.00167775	0.00347477	0.00404471	0.302357	-0.68448	1.37563	0.0933864	0.271723		0.571543	4
lcAATATILDkPEDR	O35215	D-dopachrome decarboxylase	1.08186	1.0399	1.06088	0.0171776	0.0126904	0.0156338	0.0148446	0.0150866	0.0168069	0.0141391	0.00557894	0.0137803	0.0125763	-0.0314753	0.155954	-1.48661	-0.107333	-0.367366		0.591041	4
lcDFNPk	B1AWE0	Clathrin light chain A	0.935048	0.891154	0.913101	0.00326269	0.00227862	0.00258704	0.00188097	0.00250233	0.00356451	0.00294655	0.00227217	0.00255905	0.00283557	0.127643	0.370869	-0.187231	0.444129	0.188853		0.280272	4
lDcAQLk	P16330	2',3'-cyclic-nucleotide 3'-phosphodiesterase	1.02618	1.06668	1.04643	0.0157963	0.022837	0.0175559	0.0182629	0.018613	0.0199248	0.0169391	0.00503787	0.0228746	0.0161941	0.33498	-0.431021	-1.80108	0.324825	-0.393073		0.514049	4
lHQVYFDAPScVk	Q62277	Synaptophysin	0.861215	0.880907	0.871061	0.00433918	0.00615075	0.00854208	0.0108379	0.00746747	0.0119129	0.00968171	0.00653342	0.00729911	0.0088568	1.45704	0.654499	-0.386748	-0.570287	0.288625		0.537146	4
lVDVIcEk	P63011	Ras-related protein Rab-3A	0.854317	0.834833	0.844575	0.00907002	0.0070974	0.00902841	0.0100963	0.00882303	0.00875081	0.00991384	0.00928852	0.0100007	0.00948846	-0.0516886	0.482154	0.0409767	-0.0137279	0.114429		0.70023	4
ncSETQYESk	P61982	14-3-3 protein gamma	1.16145	1.14264	1.15205	0.0747127	0.058689	0.0658162	0.0880119	0.0718074	0.0484051	0.0577556	0.0336708	0.0601743	0.0500014	-0.626195	-0.023129	-0.966944	-0.548552	-0.541205		9.999e-05	4
qLIcDPSYIPDRVQk	P50396	Rab GDP dissociation inhibitor alpha	1.03213	1.0505	1.04131	0.00196217	0.00160135	0.000752601	0.000812299	0.00128211	0.00158982	0.00148247	0.00131085	0.00108156	0.00136618	-0.303587	-0.111285	0.800547	0.413034	0.199677		0.523348	4
sADcSVEEEPWkR	P43006	Excitatory amino acid transporter 2	0.860554	0.879579	0.870067	0.0075321	0.00443633	0.00625636	0.00260602	0.0052077	0.00398603	0.00509847	0.00775466	0.00898067	0.00645496	-0.918099	0.2007	0.309741	1.78497	0.344329		0.573743	4
scNcLLLk	Q6PHC1	Alpha-enolase	1.03716	1.22274	1.12995	0.039538	0.0385232	0.0457245	0.043177	0.0417407	0.0423366	0.0384051	0.0299755	0.038024	0.0371853	0.098663	-0.00443116	-0.609186	-0.183352	-0.174576		0.284072	4
sIPIcTLk	P31254	Ubiquitin-like modifier-activating enzyme 1 Y	0.987008	1.02098	1.00399	0.0189404	0.0143028	0.0141706	0.0166308	0.0160111	0.0198271	0.0177837	0.0139335	0.0156331	0.0167944	0.066011	0.314255	-0.0243435	-0.0892489	0.0666683		0.688931	4
tkFENLck	P07901	Heat shock protein HSP 90-alpha	0.941524	1.16017	1.05085	0.00141796	0.00260442	0.00120612	0.00340762	0.00215903	0.00368536	0.00439714	0.0014161	0.00201285	0.00287786	1.37799	0.755601	0.231545	-0.759522	0.401403		0.451655	4
vcNPIITk	Q504P4	Heat shock cognate 71 kDa protein	0.882434	1.1729	1.02767	0.217351	0.254286	0.252186	0.259032	0.245714	0.267081	0.261139	0.152525	0.238398	0.229786	0.297252	0.0383697	-0.725437	-0.119761	-0.127394		0.679232	4
vSQTTWDSGFcAVNPk	O89053	Coronin	0.845265	0.923875	0.88457	0.00313986	0.00304238	0.00294344	0.00428471	0.0033526	0.00437276	0.0054489	0.00321569	0.0031465	0.00404596	0.477846	0.840767	0.127622	-0.445449	0.250197		0.279172	4
vTVAGLAGkDPVQcSR	Q99LX0	Protein deglycase DJ-1	0.991359	1.04069	1.01603	0.00126082	0.001512	0.0020358	0.00225624	0.00176621	0.00232057	0.00143949	0.0022806	0.00180997	0.00196266	0.880124	-0.0708988	0.163821	-0.317958	0.163772		0.69833	4
yIQAAck	Q68FD5	Clathrin heavy chain 1	0.692551	1.04928	0.870917	0.00969699	0.00975265	0.00855471	0.0080341	0.00900961	0.0141771	0.0134681	0.00722576	0.00714933	0.0105051	0.547956	0.465683	-0.24357	-0.168328	0.150435		0.40076	4
yNTDcVQGLTHSk	Q6PIC6	Sodium/potassium-transporting ATPase subunit alpha-3	0.91112	0.899402	0.905261	0.00918901	0.00745971	0.00904339	0.00790955	0.00840042	0.0108286	0.0089806	0.00542095	0.00955102	0.00869528	0.236858	0.267692	-0.738317	0.272059	0.00957313		0.991401	4
aLANSLAcQGk	P05064	Fructose-bisphosphate aldolase A	0.960574	0.974597	0.967585	0.00338408	0.00192744	0.00317664	N.A.	0.00282939	0.00398016	0.00203529	0.00176557	N.A.	0.00259367	0.234062	0.0785454	-0.847364	N.A.	-0.178252		0.89961	3
aYDATcLVk	Q9R0P3	S-formylglutathione hydrolase	0.962943	1.00613	0.984537	0.00685128	0.00286152	0.00301767	N.A.	0.00424349	0.00701934	0.00311622	0.00288202	N.A.	0.00433919	0.0349616	0.123016	-0.0663572	N.A.	0.0305402		0.60134	3
dVEREDIEFIck	G5E839	T-complex protein 1 subunit delta	1.02569	1.05852	1.0421	0.00299056	0.00246721	0.00283023	N.A.	0.00276267	0.00326763	0.00252953	0.00269385	N.A.	0.00283034	0.127832	0.0359909	-0.0712528	N.A.	0.0308565		0.59804	3
gVLFGVPGAFTPGcSk	G3UZJ4	Peroxiredoxin-5, mitochondrial	0.959192	0.84554	0.902366	0.0140409	0.00702188	0.00741322	N.A.	0.00949201	0.0140681	0.0082725	0.0082725	N.A.	0.0102044	0.00278983	0.236465	0.158223	N.A.	0.132493		9.999e-05	3
lcDFGSAk	Q9WV60	Glycogen synthase kinase-3 beta	1.00698	0.982057	0.994517	0.017383	0.0155876	0.0106631	N.A.	0.0145446	0.0144916	0.0156981	0.0143724	N.A.	0.014854	-0.262461	0.0101885	0.430669	N.A.	0.0594657		0.640536	3
ncFASVFEk	D3YXG6	Actin-related protein 2/3 complex subunit 2	1.04342	1.06485	1.05414	0.0376703	0.0314733	0.033977	N.A.	0.0343735	0.0310772	0.0322664	0.0293206	N.A.	0.0308881	-0.27757	0.0359004	-0.212642	N.A.	-0.151437		0.305969	3
sTLTDSLVck	P58252	Elongation factor 2	0.907724	0.938824	0.923274	0.0143135	0.00319899	0.00258234	N.A.	0.00669827	0.0147984	0.00333532	0.0038689	N.A.	0.00733421	0.0480691	0.060206	0.583245	N.A.	0.230507		9.999e-05	3
tEIQVNcPk	D6RFU9	Synaptophysin-like protein 1	1.0723	1.16906	1.12068	0.0178782	0.128179	0.122436	N.A.	0.0894979	0.0176622	0.0606365	0.135596	N.A.	0.0712982	-0.0175384	-1.07991	0.147285	N.A.	-0.31672		0.633937	3
tLDcEPk	P15105	Glutamine synthetase	0.908025	0.914018	0.911021	0.00385919	0.00092436	0.00185568	N.A.	0.00221308	0.00443162	0.00154588	0.00266125	N.A.	0.00287958	0.199535	0.741905	0.520159	N.A.	0.487199		9.999e-05	3
tTIcGkGLSATVTGGQk	P60202	Myelin proteolipid protein	0.858413	0.928385	0.893399	0.0324019	0.0397268	0.0389147	N.A.	0.0370145	0.0968696	0.0236227	0.0367621	N.A.	0.0524181	1.57996	-0.749939	-0.0820959	N.A.	0.24931		0.90191	3
vcGSNLLSIck	P60202	Myelin proteolipid protein	0.921746	1.27706	1.0994	0.0212414	0.0123629	0.0351251	N.A.	0.0229098	0.00406795	0.00290229	0.0198151	N.A.	0.00892845	-2.38451	-2.09076	-0.825902	N.A.	-1.76705		9.999e-05	3
vGAFTVVckDAEEAk	P05202	Aspartate aminotransferase, mitochondrial	1.01265	0.981878	0.997264	0.00421039	0.000671836	0.00252565	N.A.	0.00246929	0.0038284	0.00278758	0.00249181	N.A.	0.00303593	-0.137214	2.05283	-0.0194635	N.A.	0.632051		0.906309	3
vLGFcHYYLPEEQFPk	Q6PIC6	Sodium/potassium-transporting ATPase subunit alpha-3	0.791692	0.954308	0.873	0.0215388	0.00829801	0.00851681	N.A.	0.0127845	0.0270137	0.00813109	0.00819646	N.A.	0.0144471	0.32675	-0.029316	-0.0553121	N.A.	0.0807072		0.89911	3
yMAccLLYRGDVVPk	P68373;P68368	Tubulin alpha-1C/4A chain	1.12013	1.19911	1.15962	0.0117008	0.00752123	0.00727451	N.A.	0.00883218	0.011724	0.00535846	0.00606428	N.A.	0.00771556	0.00285188	-0.48915	-0.262515	N.A.	-0.249604		0.293471	3
aIPDLDcASk	B1AQX6	SRC kinase-signaling inhibitor 1	0.880743	0.952011	0.916377	0.00471008	0.00544584	N.A.	N.A.	0.00507796	0.00589566	0.00641973	N.A.	N.A.	0.00615769	0.237358	0.323901	N.A.	N.A.	0.28063	RSDd	0.0424048	2
aLDLDSSckEAADGYQR	Q60864	Stress-induced-phosphoprotein 1	1.1708	0.963542	1.06717	0.0113349	0.0113349	N.A.	N.A.	0.0113349	0.0119866	0.0132946	N.A.	N.A.	0.0126406	0.230065	0.0806468	N.A.	N.A.	0.155356		0.073169	2
aVLFcLSEDkk	P18760	Cofilin-1	1.00039	0.997374	0.998882	0.00123954	0.00167116	N.A.	N.A.	0.00145535	0.00150763	0.00155453	N.A.	N.A.	0.00153108	-0.10437	0.282481	N.A.	N.A.	0.0890556		0.188479	2
dNILIEcEAk	A0A087WNW2	Neurofascin	0.923794	0.934055	0.928925	0.0178853	0.0185196	N.A.	N.A.	0.0182024	0.0182716	0.019967	N.A.	N.A.	0.0191193	0.10857	0.0308291	N.A.	N.A.	0.0696998		0.0380941	2
eFkGLGDcLVk	P51881	ADP/ATP translocase 2	0.885266	0.941802	0.913534	0.00234067	0.00471259	N.A.	N.A.	0.00352663	0.00447129	0.00378419	N.A.	N.A.	0.00412774	-0.316534	0.933771	N.A.	N.A.	0.308619		0.577132	2
eGVVEcSFVQSk	P08249	Malate dehydrogenase, mitochondrial	0.991284	0.864023	0.927654	0.0228071	0.0226368	N.A.	N.A.	0.0227219	0.0225461	0.0233534	N.A.	N.A.	0.0229497	0.0449619	-0.0166054	N.A.	N.A.	0.0141782		0.0301713	2
gILLYGPPGcGk	P46460	Vesicle-fusing ATPase	0.862117	0.764637	0.813377	0.00259579	0.00187947	N.A.	N.A.	0.00223763	0.00241399	0.00241399	N.A.	N.A.	0.00241399	0.361091	-0.104756	N.A.	N.A.	0.128167		0.226362	2
gLYDGPVcEVSVTPk	O08553	Dihydropyrimidinase-related protein 2	1.13003	0.914316	1.02217	6.41731e-05	0.00270958	N.A.	N.A.	0.00138687	0.00163442	0.00130304	N.A.	N.A.	0.00146873	-1.05619	4.67067	N.A.	N.A.	1.80724		1.3618	2
gYSIPEcQk	Q9CZU6	Citrate synthase, mitochondrial	0.979826	0.886455	0.93314	0.00181544	0.00247927	N.A.	N.A.	0.00214735	0.00301227	0.00307448	N.A.	N.A.	0.00304338	0.310428	0.730536	N.A.	N.A.	0.520482		0.204465	2
icSPDkMIGFSETAk	P46460	Vesicle-fusing ATPase	1.46104	0.936179	1.19861	0.00912071	0.00986334	N.A.	N.A.	0.00949203	0.0106756	0.00934023	N.A.	N.A.	0.0100079	-0.0786183	0.227098	N.A.	N.A.	0.0742399		0.149282	2
iNMcGLTTk	P05201	Aspartate aminotransferase, cytoplasmic	0.998497	1.02442	1.01146	0.00859132	0.00911311	N.A.	N.A.	0.00885221	0.00798205	0.00797664	N.A.	N.A.	0.00797935	-0.192162	-0.10612	N.A.	N.A.	-0.149141		0.042159	2
iVSSkDYcVTANSk	D3Z736	L-lactate dehydrogenase	0.902043	0.988593	0.945318	0.00626215	0.0060624	N.A.	N.A.	0.00616228	0.00448687	0.00605378	N.A.	N.A.	0.00527033	-0.00205424	-0.480947	N.A.	N.A.	-0.241501		0.232587	2
lVIVGDGAcGk	Q9QUI0	Transforming protein RhoA	0.991638	0.942525	0.967082	0.0165069	0.0398022	N.A.	N.A.	0.0281546	0.0175135	0.0352855	N.A.	N.A.	0.0263995	-0.173774	0.0853972	N.A.	N.A.	-0.0441885		0.126687	2
lVLcEVFk	P15105	Glutamine synthetase	0.940808	0.837503	0.889155	0.015315	0.0170019	N.A.	N.A.	0.0161585	0.0196717	0.0182865	N.A.	N.A.	0.0189791	0.105083	0.361178	N.A.	N.A.	0.23313		0.125191	2
nIINkDGGSYVck	O35136	Neural cell adhesion molecule 2	0.820525	0.887298	0.853911	0.00335385	0.00379672	N.A.	N.A.	0.00357528	0.00377317	0.00707269	N.A.	N.A.	0.00542293	0.897506	0.169959	N.A.	N.A.	0.533733		0.349222	2
nkGVVLGGcGDk	P61922	4-aminobutyrate aminotransferase, mitochondrial	1.15574	1.05495	1.10535	0.00963382	0.0103045	N.A.	N.A.	0.00996918	0.00816272	0.00816272	N.A.	N.A.	0.00816272	-0.336158	-0.239058	N.A.	N.A.	-0.287608		0.0475738	2
qIFGDYkTTIcGk	P60202	Myelin proteolipid protein	1.0793	1.05734	1.06832	0.00530422	0.00464485	N.A.	N.A.	0.00497454	0.00194222	0.00610503	N.A.	N.A.	0.00402363	0.394366	-1.44943	N.A.	N.A.	-0.527534		0.797937	2
rALANSLAcQGk	P05064	Fructose-bisphosphate aldolase A	1.3171	1.01798	1.16754	0.00327904	0.00327904	N.A.	N.A.	0.00327904	0.00384786	0.00407739	N.A.	N.A.	0.00396263	0.314375	0.230785	N.A.	N.A.	0.27258		0.0409582	2
sTcTYVGAAk	Q9DCZ1	GMP reductase 1	1.00902	1.14037	1.07469	0.0135552	0.00727329	N.A.	N.A.	0.0104143	0.0139195	0.0081301	N.A.	N.A.	0.0110248	0.03826	0.160664	N.A.	N.A.	0.0994622		0.0599579	2
tcLLNETGDEPFQYkN	P15105	Glutamine synthetase	1.08496	0.856085	0.970522	0.0034492	0.00341371	N.A.	N.A.	0.00343146	0.00359215	0.0044876	N.A.	N.A.	0.00403988	0.394603	0.0585855	N.A.	N.A.	0.226594		0.163951	2
vGAFTVVck	P05202	Aspartate aminotransferase, mitochondrial	0.916131	1.06947	0.992801	0.0011729	0.00213721	N.A.	N.A.	0.00165505	0.00147867	0.00154318	N.A.	N.A.	0.00151093	0.334227	-0.469822	N.A.	N.A.	-0.0677976		0.384195	2
yEVAVPLck	Q5UE59	Kinesin light chain 1	1.02298	1.06128	1.04213	0.00372008	0.0041177	N.A.	N.A.	0.00391889	0.00419411	0.00350528	N.A.	N.A.	0.0038497	-0.232309	0.173031	N.A.	N.A.	-0.0296387		0.197372	2
acSLAk	P63101	14-3-3 protein zeta/delta	0.514723	N.A.	0.514723	0.30101	0.256176	N.A.	N.A.	0.278593	0.54953	0.538731	N.A.	N.A.	0.544131	0.868386	1.07243	N.A.	N.A.	0.97041		0.0998431	2
dcLPELk	E9PUD2	Dynamin-1-like protein	0.942412	N.A.	0.942412	0.00994434	0.00837873	N.A.	N.A.	0.00916154	0.00709848	0.00890797	N.A.	N.A.	0.00800323	-0.486366	0.0883655	N.A.	N.A.	-0.199		0.278025	2
eAVAIck	Q2NKI4	Protein kinase C	0.856234	N.A.	0.856234	0.000132646	0.00234243	N.A.	N.A.	0.00123754	0.00223696	0.00312366	N.A.	N.A.	0.00268031	4.07588	0.415236	N.A.	N.A.	2.24556		1.20695	2
fGSGPck	Q9D7N9	Adipocyte plasma membrane-associated protein	1.06813	N.A.	1.06813	0.0184202	0.0135266	N.A.	N.A.	0.0159734	0.0126638	0.0239947	N.A.	N.A.	0.0183293	-0.540577	0.82692	N.A.	N.A.	0.143171		0.6242	2
fILScADDk	P63005	Platelet-activating factor acetylhydrolase IB subunit alpha	0.753257	N.A.	0.753257	0.0331884	0.043229	N.A.	N.A.	0.0382087	0.0225395	0.0427878	N.A.	N.A.	0.0326636	-0.558226	-0.0147981	N.A.	N.A.	-0.286512		0.263244	2
fRGYSIPEcQk	Q9CZU6	Citrate synthase, mitochondrial	0.987835	N.A.	0.987835	0.000716232	0.000716232	N.A.	N.A.	0.000716232	0.00452001	0.00386939	N.A.	N.A.	0.0041947	2.65783	2.4336	N.A.	N.A.	2.54572		0.109677	2
gkTEIQVNcPk	D6RFU9	Synaptophysin-like protein 1	0.958067	N.A.	0.958067	0.305315	0.276752	N.A.	N.A.	0.291033	0.217165	0.347021	N.A.	N.A.	0.282093	-0.491506	0.326428	N.A.	N.A.	-0.0825388		0.390489	2
gkVNSITVDNck	D3YTR7	Adenylyl cyclase-associated protein	0.840282	N.A.	0.840282	0.0245203	0.0224702	N.A.	N.A.	0.0234952	0.0231669	0.0331188	N.A.	N.A.	0.0281429	-0.0819152	0.559642	N.A.	N.A.	0.238863		0.309364	2
iEAAcFATIkDGk	Q9D6R2	Isocitrate dehydrogenase [NAD] subunit alpha, mitochondrial	1.02913	N.A.	1.02913	0.010158	0.011443	N.A.	N.A.	0.0108005	0.00839544	0.00999735	N.A.	N.A.	0.0091964	-0.274938	-0.194844	N.A.	N.A.	-0.234891		0.0392461	2
iIAcDGGGGALGHPk	P52503	NADH dehydrogenase [ubiquinone] iron-sulfur protein 6, mitochondrial	1.40584	N.A.	1.40584	0.0492102	0.0209882	N.A.	N.A.	0.0350992	0.0149294	0.0473795	N.A.	N.A.	0.0311545	-1.72081	1.17468	N.A.	N.A.	-0.273061		1.07913	2
lIVPFcGHIk	Q8VED9	Galectin-related protein	1.26601	N.A.	1.26601	0.0100009	0.0086796	N.A.	N.A.	0.00934026	0.00242194	0.0129876	N.A.	N.A.	0.00770478	-2.0459	0.581435	N.A.	N.A.	-0.73223		1.02022	2
mcLVEIEkAPk	Q91VD9	NADH-ubiquinone oxidoreductase 75 kDa subunit, mitochondrial	0.988494	N.A.	0.988494	0.000607921	0.00419195	N.A.	N.A.	0.00239994	0.00263931	0.00293591	N.A.	N.A.	0.00278761	2.1182	-0.513813	N.A.	N.A.	0.802195		1.02132	2
ncIGDFLk	Q6ZQ38	Cullin-associated NEDD8-dissociated protein 1	1.04642	N.A.	1.04642	0.012114	0.0110543	N.A.	N.A.	0.0115842	0.00983754	0.00928797	N.A.	N.A.	0.00956275	-0.300312	-0.251177	N.A.	N.A.	-0.275744		0.0240801	2
nHTGEKLFEcKk	E9Q9G3	Protein Zfp938	1.05495	N.A.	1.05495	0.0166233	0.01735	N.A.	N.A.	0.0169867	0.0138771	0.0144869	N.A.	N.A.	0.014182	-0.260505	-0.260191	N.A.	N.A.	-0.260348		0.000154278	2
nSLDcEIVSAk	P40124	Adenylyl cyclase-associated protein 1	0.90126	N.A.	0.90126	0.0245447	0.0259403	N.A.	N.A.	0.0252425	0.0292844	0.0272933	N.A.	N.A.	0.0282888	0.254717	0.0733518	N.A.	N.A.	0.164035		0.0887757	2
sAPSIPkENFScLTR	P14152	Malate dehydrogenase, cytoplasmic	1.05373	N.A.	1.05373	0.0005318	0.00201093	N.A.	N.A.	0.00127136	0.00171617	0.00237918	N.A.	N.A.	0.00204768	1.69024	0.242607	N.A.	N.A.	0.966421		0.655432	2
sSGFcPk	A2AMH3	Choline transporter-like protein 1	1.00882	N.A.	1.00882	0.020874	0.0132355	N.A.	N.A.	0.0170548	0.00891131	0.0232359	N.A.	N.A.	0.0160736	-1.228	0.811939	N.A.	N.A.	-0.208029		0.860951	2
tAWRLDcAQLk	P16330	2',3'-cyclic-nucleotide 3'-phosphodiesterase	1.149	N.A.	1.149	0.00290181	0.0060926	N.A.	N.A.	0.00449721	0.00414528	0.00911442	N.A.	N.A.	0.00662985	0.514518	0.581091	N.A.	N.A.	0.547805		0.0326236	2
yNPNVLPVQcTGkR	P14094	Sodium/potassium-transporting ATPase subunit beta-1	0.828219	N.A.	0.828219	0.00862704	0.00714176	N.A.	N.A.	0.0078844	0.00716807	0.0074198	N.A.	N.A.	0.00729394	-0.267281	0.0551018	N.A.	N.A.	-0.106089		0.157355	2
aRelative SNO site occupancy percentage is calculated based on normalized reporter ion intensities of SNO to total cysteine in WT or AD. A 10-fold loading amount of SNO sample is considered.
bSNO fold changes are corrected by protein level abundance change.
cP-value cutoff (<0.05) is applied for group of N = 4 and 3.
dRSD cutoff (<30%) is applied for group of N =2 .
eNumber of biological replicates quantified.
