# Supplementary material for: High-throughput endogenous measurement of S-nitrosylation in Alzheimer's disease using oxidized cysteine-selective cPILOT
Source: Royal Society of Chemistry journal article supplement (doi:10.1039/c6an00417b), 2016-01-01
Supplement: c6an00417b4.xlsx [file c6an00417b4.xlsx]

## Sheet: SNO Peptides N=1
Supplemental Table S3. List of quantified SNO-peptides (N = 1)
Sequence	Acc. No.	Protein Name
aDTLTPEEcQQFkk	O55131	Septin-7
aIIPcIk	D6RJ60	Eukaryotic initiation factor 4A-II
aILPcIk	D6RJ60	Eukaryotic initiation factor 4A-II
aSLYPcPETPQERk	K3W4T3	V-type proton ATPase subunit a
dTAFcVDSk	Q8K406	Leucine-rich repeat LGI family member 3
dYcVTANSk	D3Z736	L-lactate dehydrogenase
ecVQPATk	O55143	Sarcoplasmic/endoplasmic reticulum calcium ATPase 2
eLVLDNck	Q9EST5	Acidic leucine-rich nuclear phosphoprotein 32 family member B
ePFRcLVk	Q9CZW2	Centromere protein N
eSSEQVQPTcPk	Q922J6	Tetraspanin-2
eTDEFFKkck	P70441	Na(+)/H(+) exchange regulatory cofactor NHE-RF1
gcTATLGNFAk	P25444	40S ribosomal protein S2
gTFASLSELHcDk	E9Q223	Protein Hbb-bs (Fragment)
gVYAVGDVcGk	P47791	Glutathione reductase, mitochondrial
iDcNLLEFk	Q9Z1G3	V-type proton ATPase subunit C 1
iIEQcLNk	D3YXT0	NADH dehydrogenase [ubiquinone] iron-sulfur protein 2, mitochondrial
iIYGGSVTGATck	P17751	Triosephosphate isomerase
lAEQAERYDDmAAcMk	P63101	14-3-3 protein zeta/delta
lDNILLDAEGHck	P16054	Protein kinase C epsilon type
lIFcTGk	Z4YJV4	2-oxoglutarate dehydrogenase, mitochondrial
lLFcTGk	Z4YJV4	2-oxoglutarate dehydrogenase, mitochondrial
lVcEDPPHELPQEGk	Q922S4	cGMP-dependent 3',5'-cyclic phosphodiesterase
mREIVHIQAGQcGNQIGAk	P99024;Q9ERD7	Tubulin beta-3/5 chain
mREIVHLQAGQcGNQIGAk	P99024;Q9ERD7	Tubulin beta-3/5 chain
nIckVVEVGSk	P52480	Pyruvate kinase PKM
nILGGTVFREPIIck	P54071	Isocitrate dehydrogenase [NADP], mitochondrial
nVVAEcLGk	Q6ZQ38	Cullin-associated NEDD8-dissociated protein 1
qANcPLYVTk	O35098	Dihydropyrimidinase-related protein 4
qSVELckk	Q68FD5	Clathrin heavy chain 1
rcQYVTEk	P05064	Fructose-bisphosphate aldolase A
rTIQFVDWcPTGFk	P68373	Tubulin alpha-1C chain
sEVPGIFcAGADLkER	Q9JLZ3	Methylglutaconyl-CoA hydratase, mitochondrial
tAAVcVAk	Q5SVG5	AP-1 complex subunit beta-1
tAVcDIPPRGLk	P99024	Tubulin beta-5 chain
tIQFVDWcPTGFk	P68373	Tubulin alpha-1C chain
tSYPDcIk	E9Q939	Serotransferrin
vQGVISQLEDTck	G3X8Y1	MCG19772
vTLLDGTEYScDLEkR	O70318	Band 4.1-like protein 2
yVDIAIPcNNk	P14206	40S ribosomal protein SA
yVEcSALTQk	P60766	Cell division control protein 42 homolog
